# Supplementary material for: SOMmelier—Intuitive Visualization of the Topology of Grapevine Genome Landscapes Using Artificial Neural Networks
Source: MDPI journal article supplement (doi:10.3390/genes11070817), 2020-07-17

Armenia

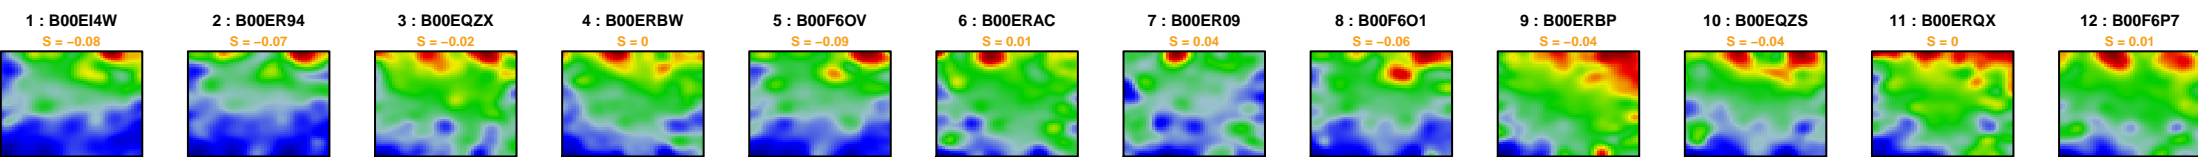

Balkans

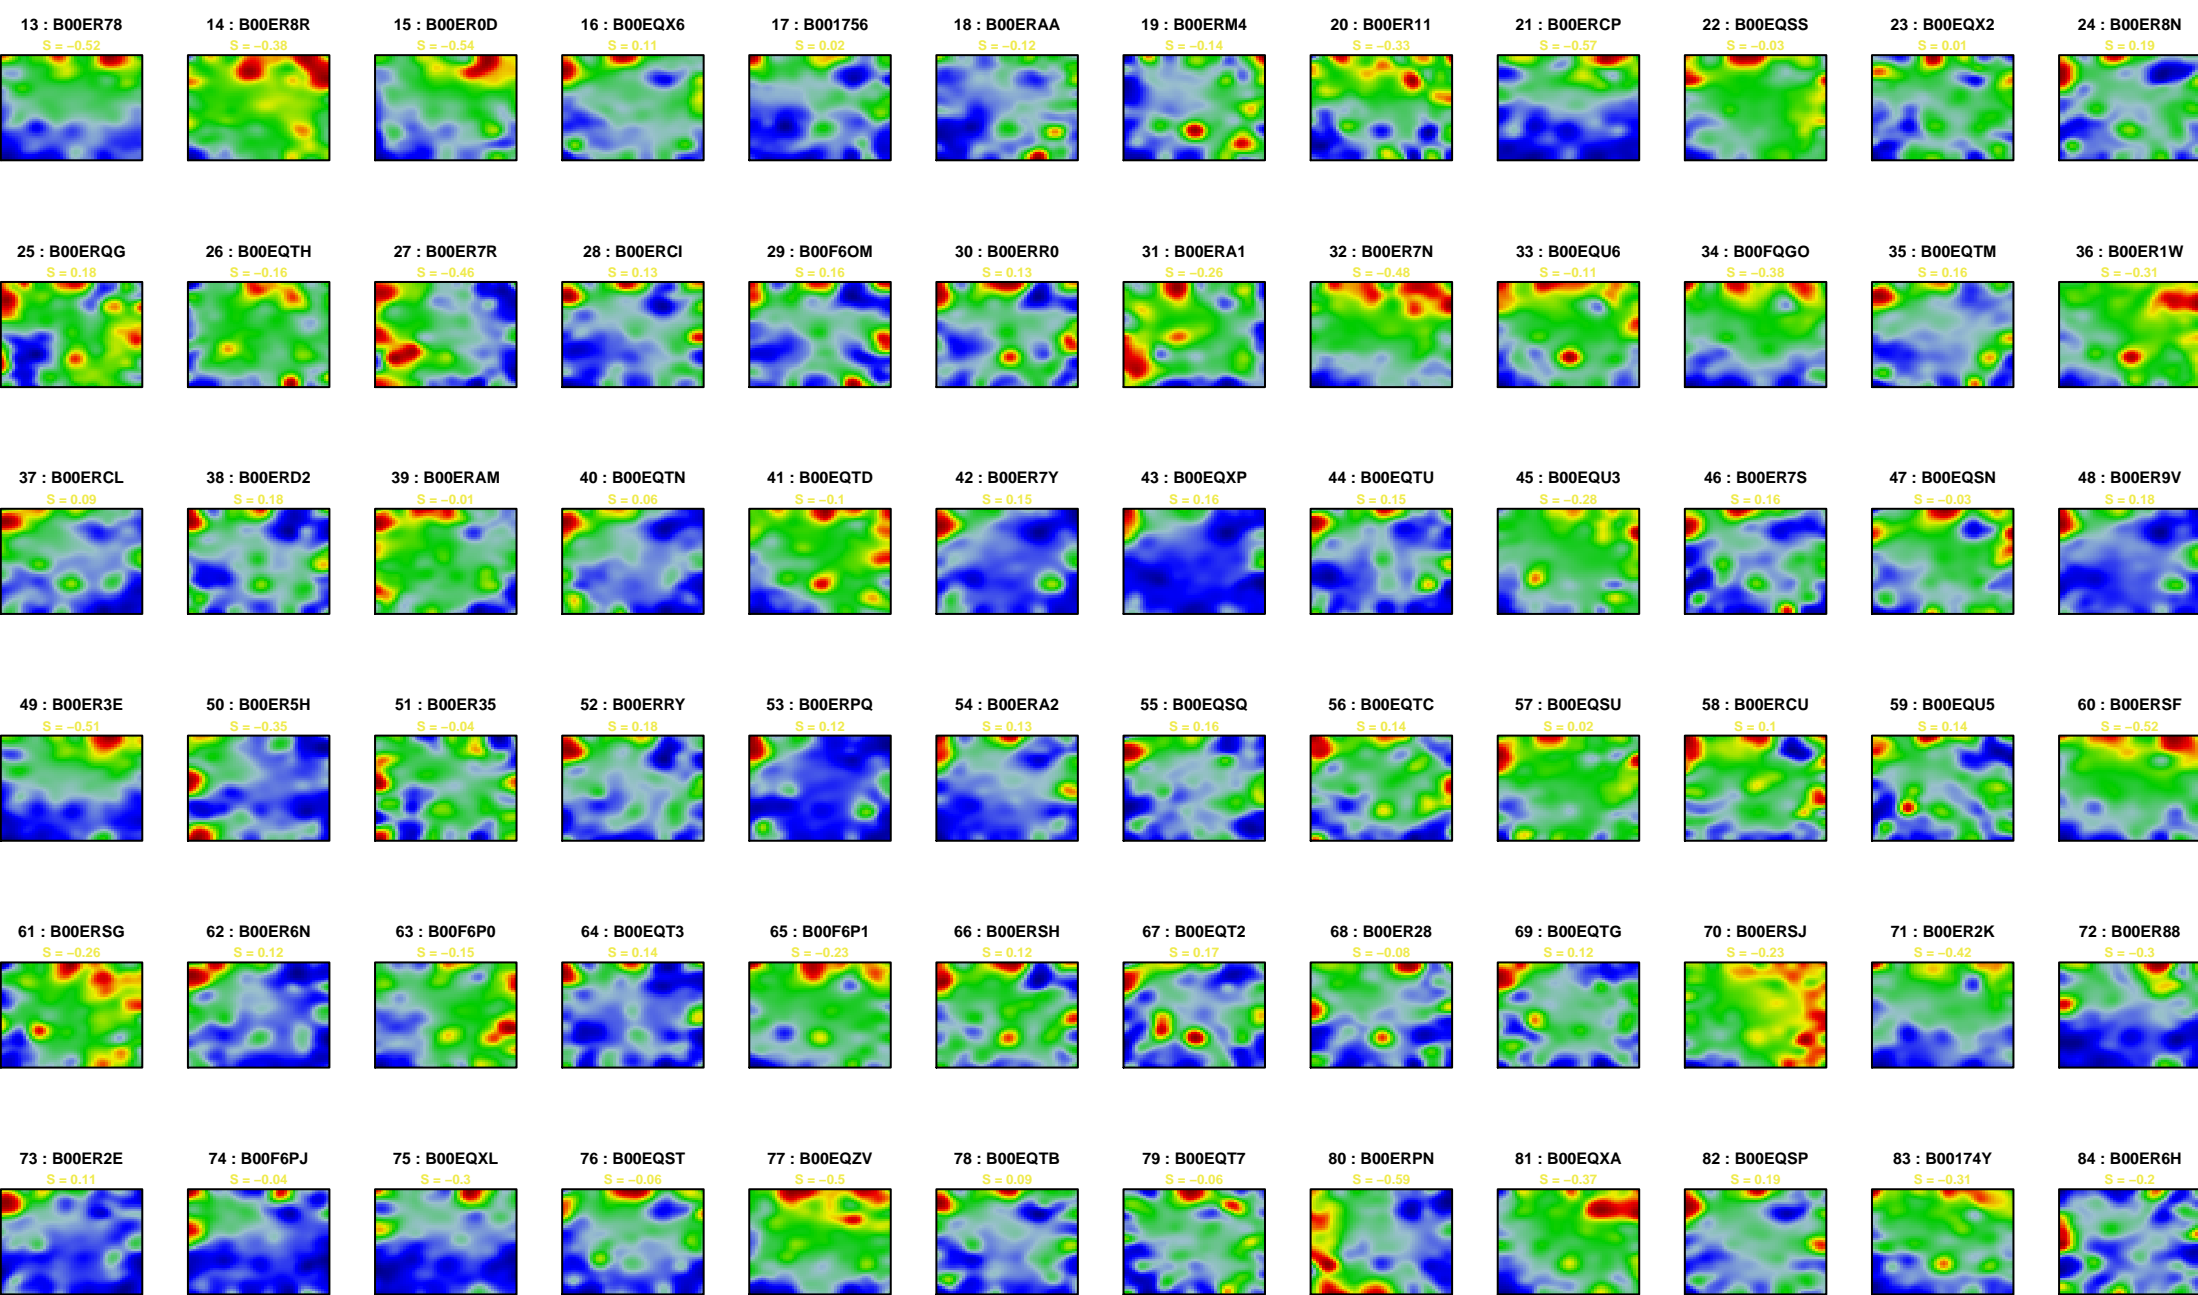

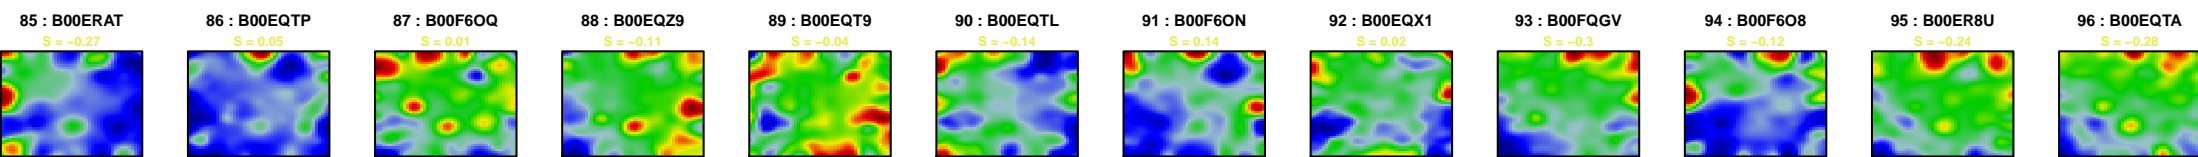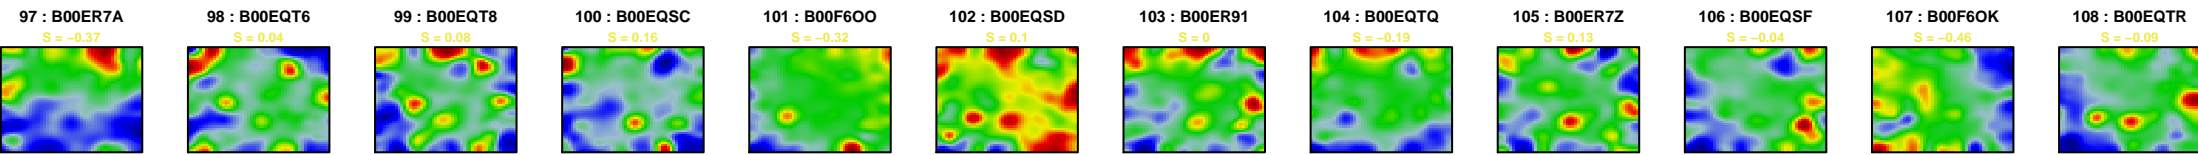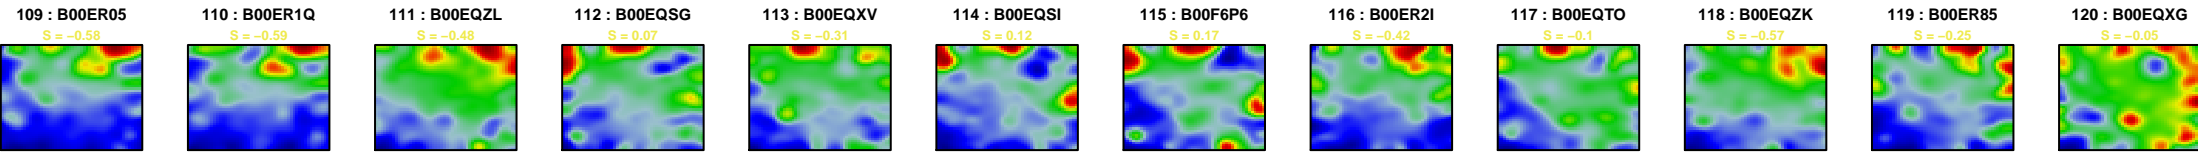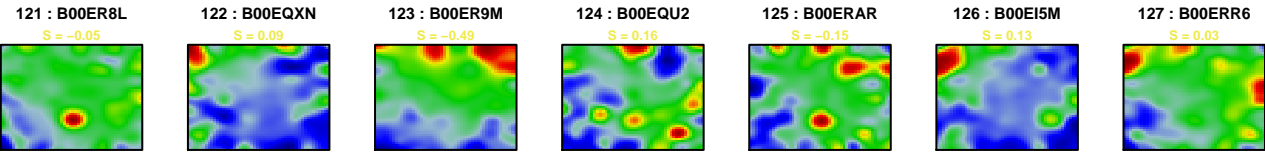

## Eastern\_Mediterranean\_Caucasus

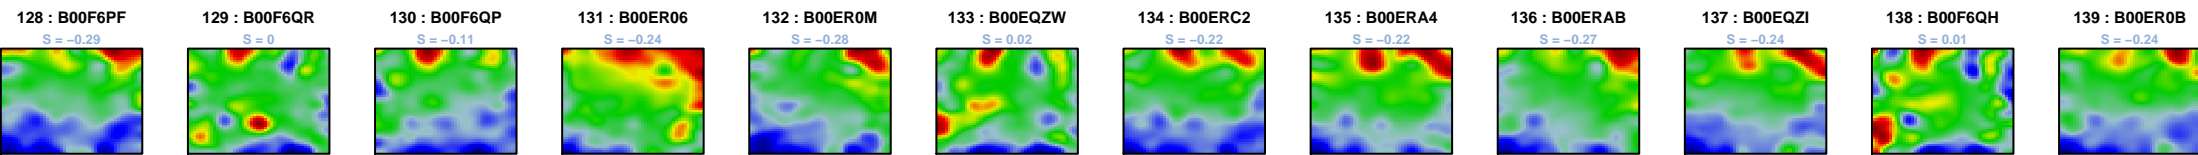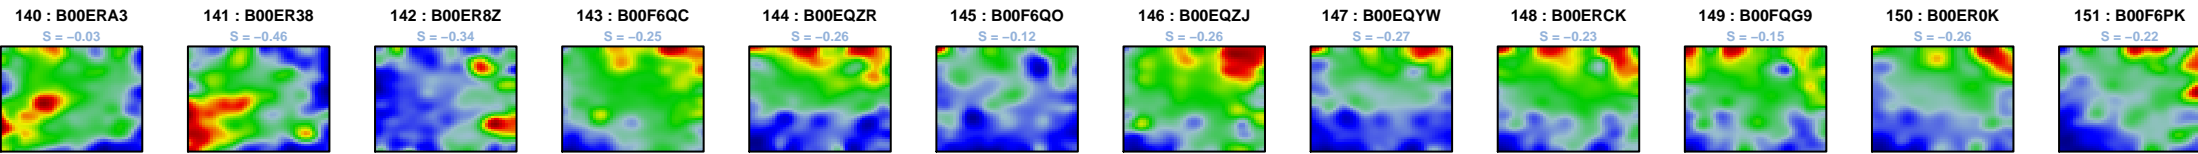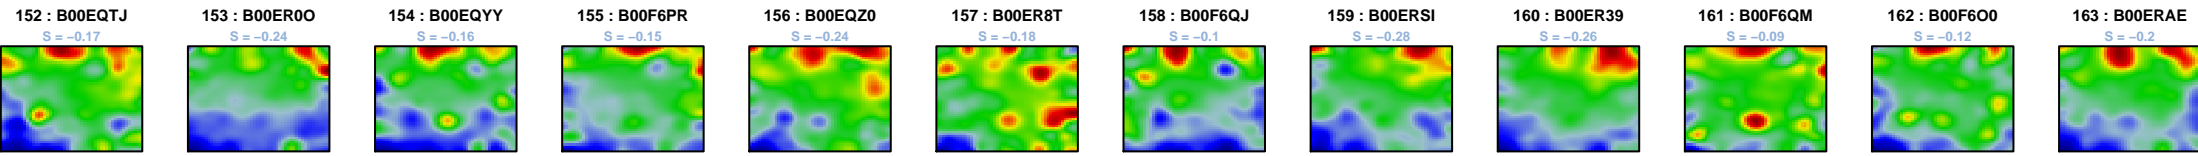

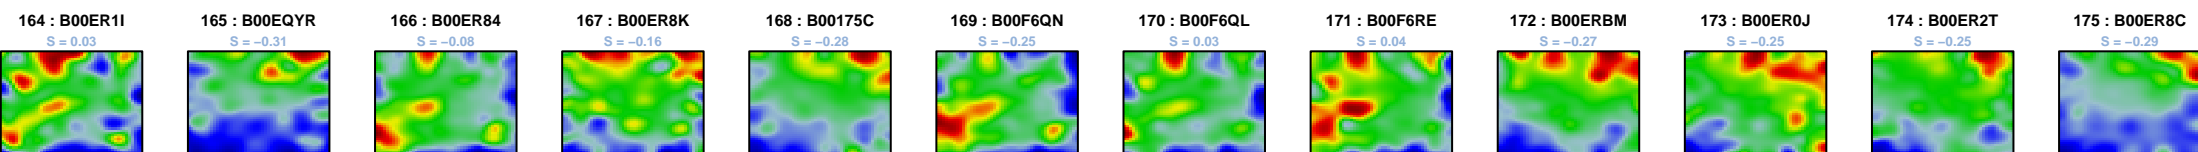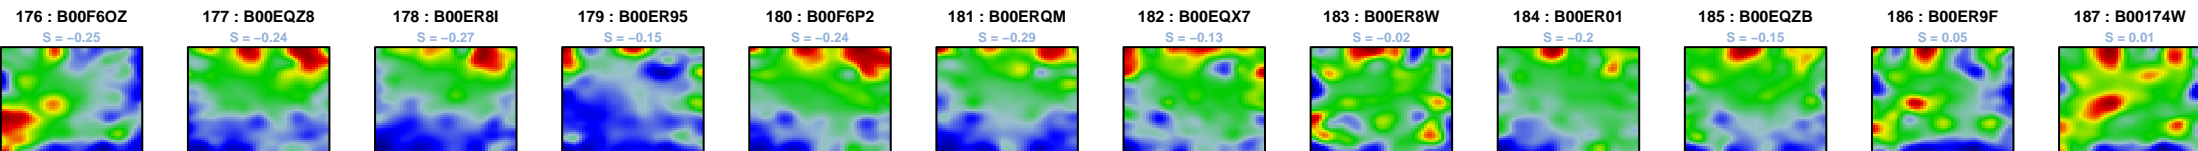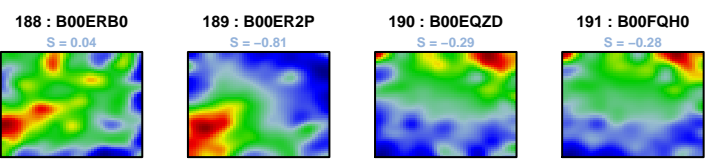

*Iberian\_peninsula*

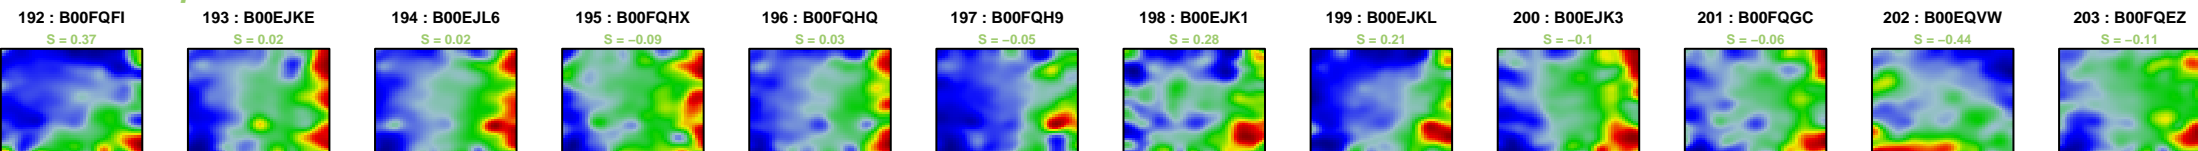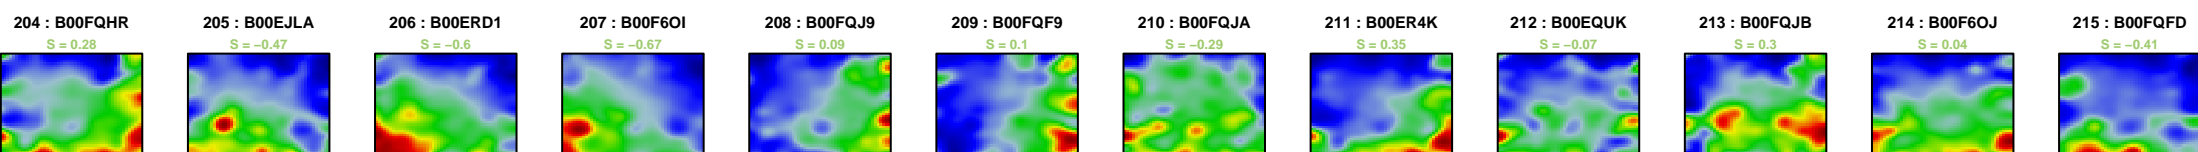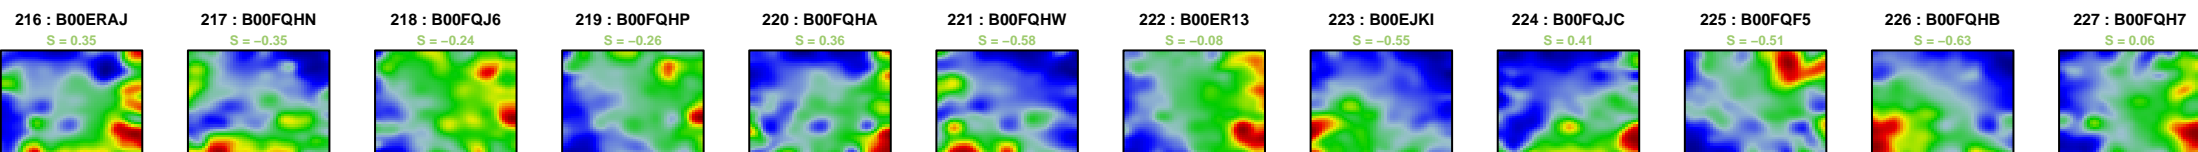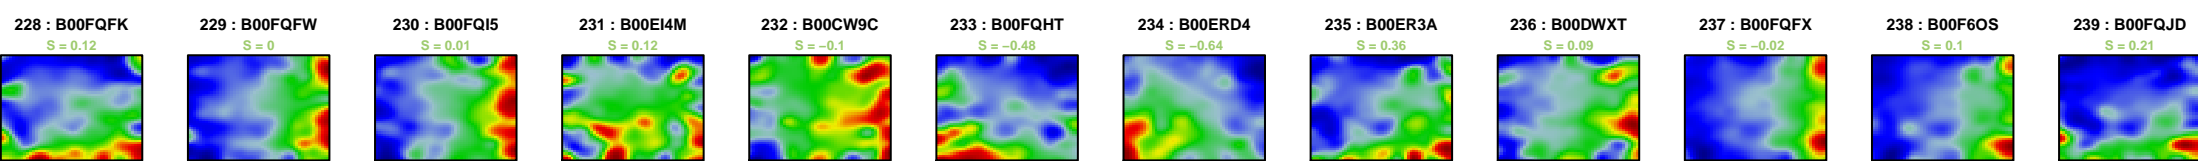

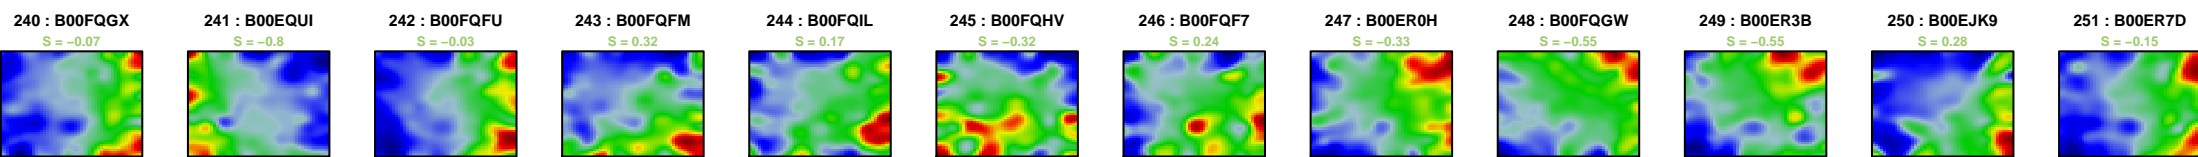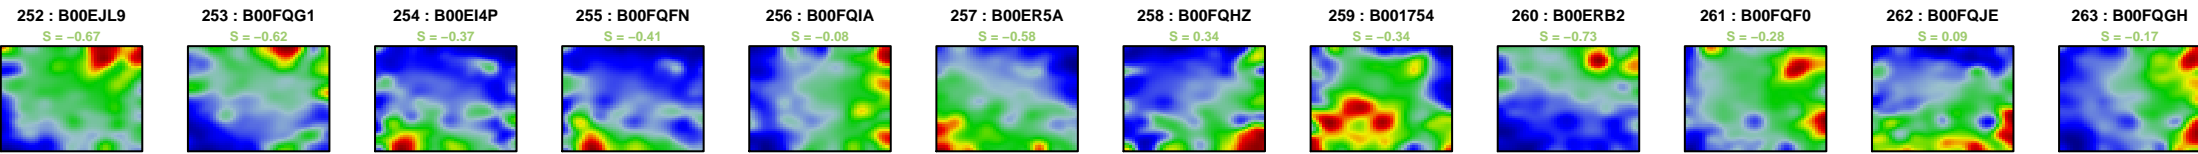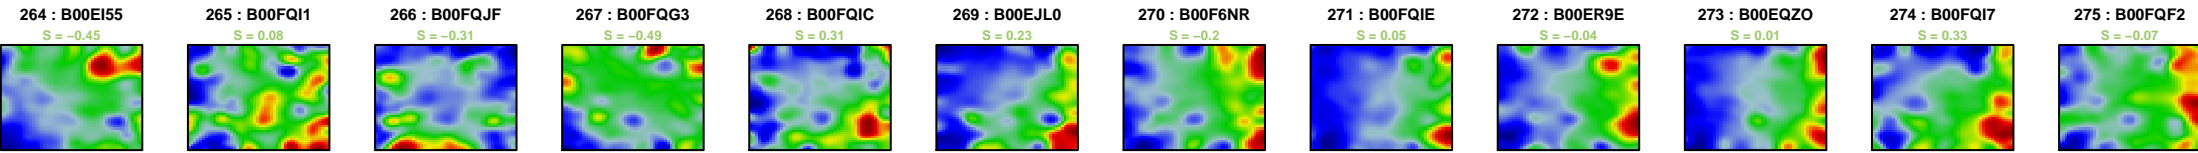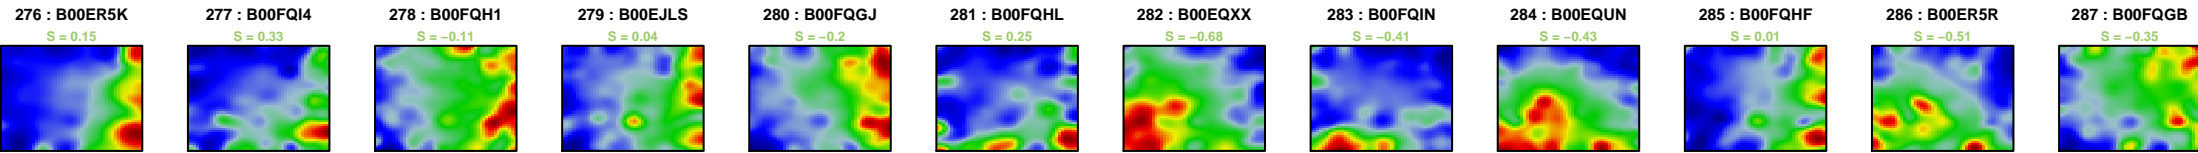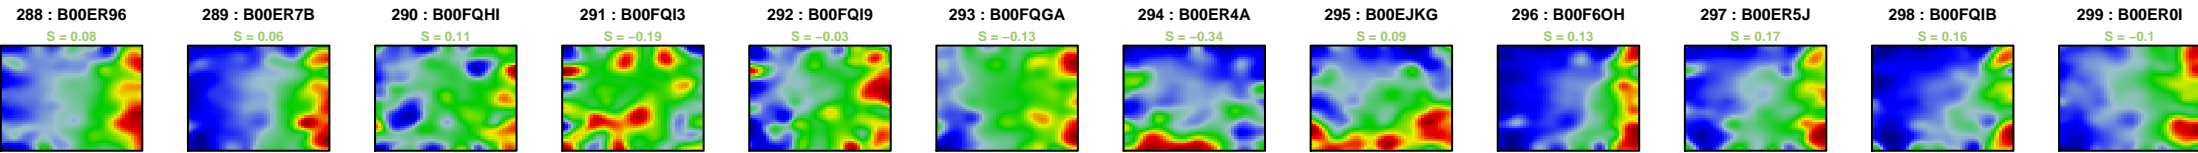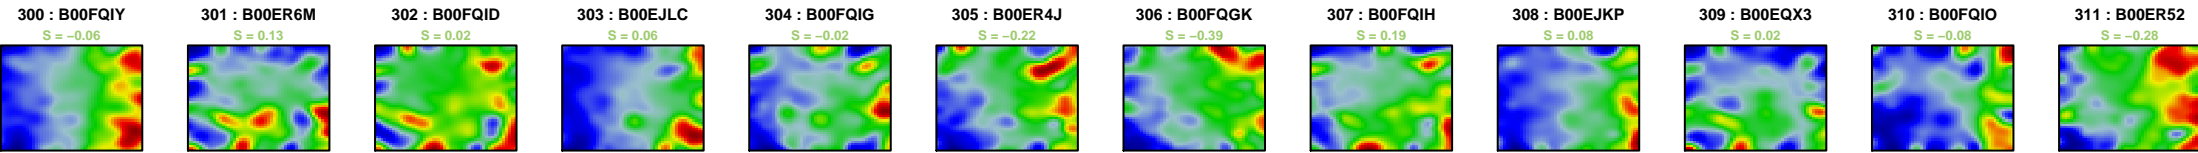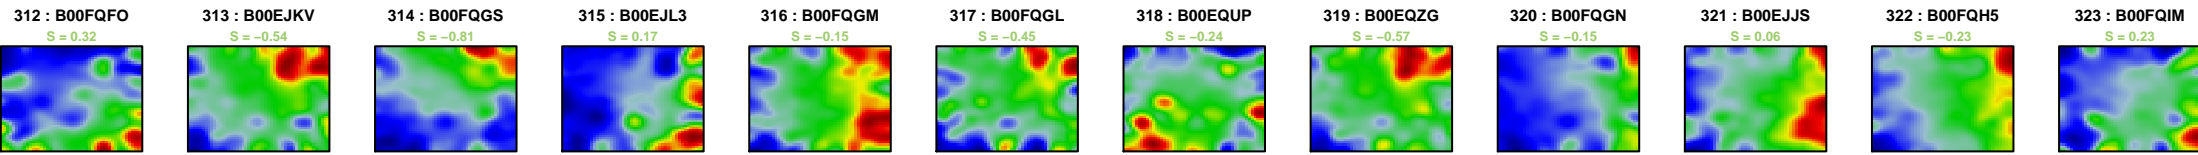



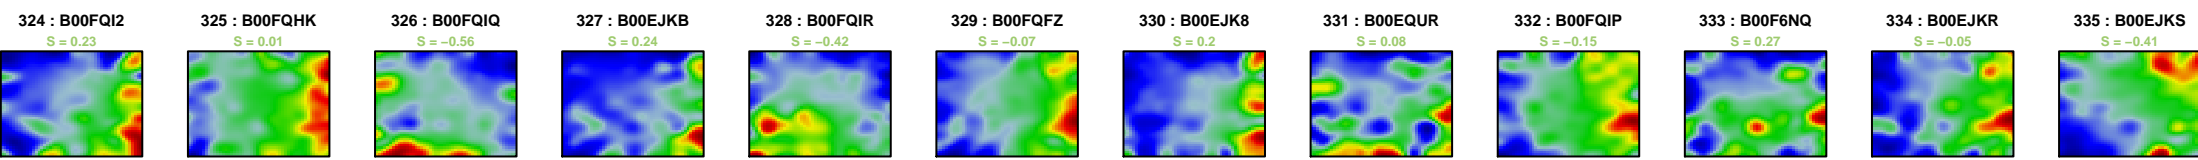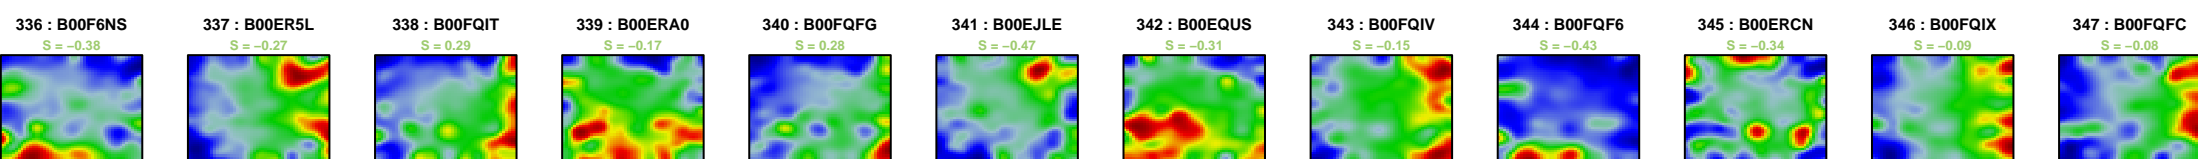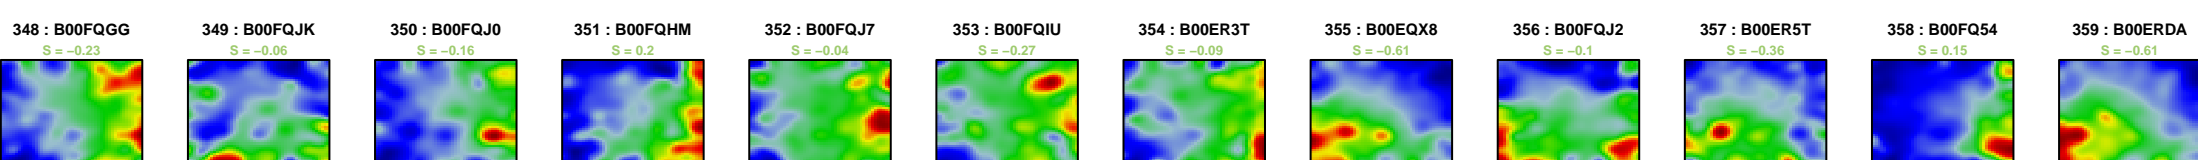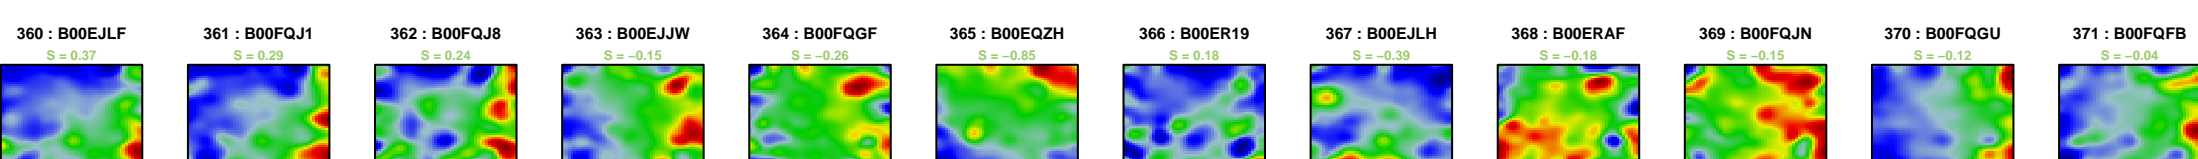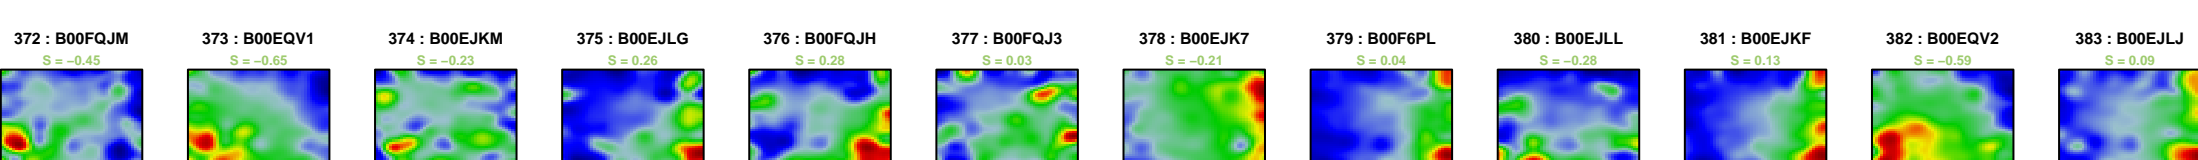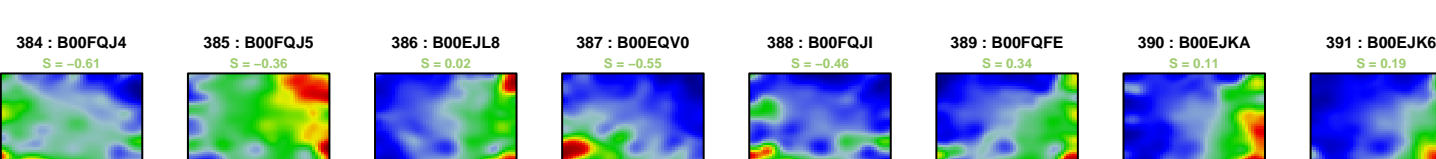

*Italian\_peninsula*

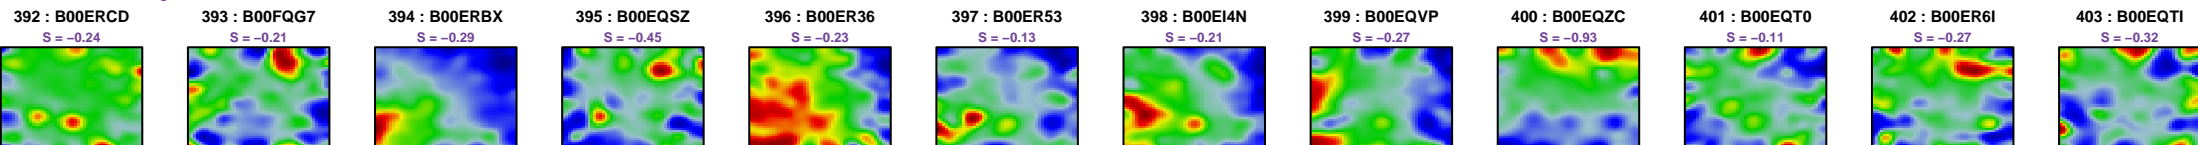

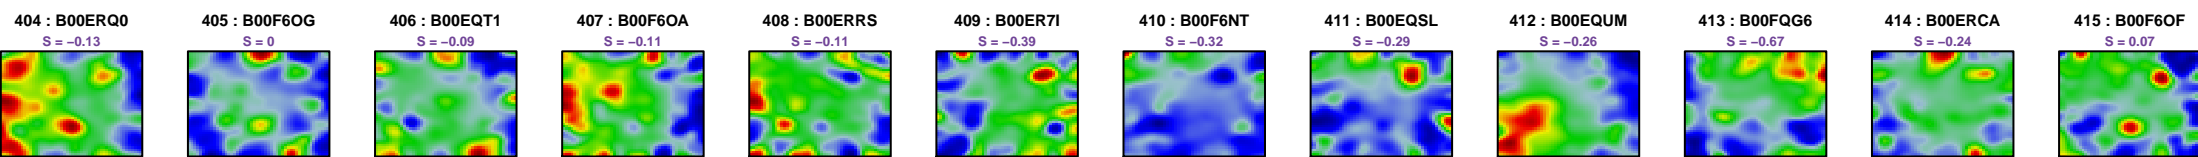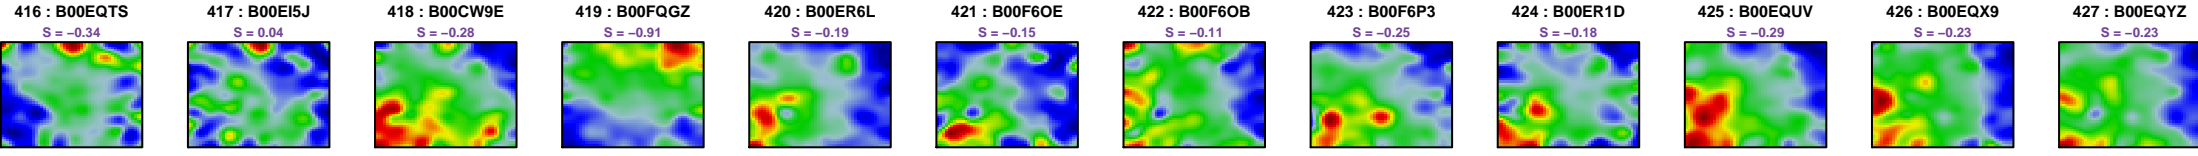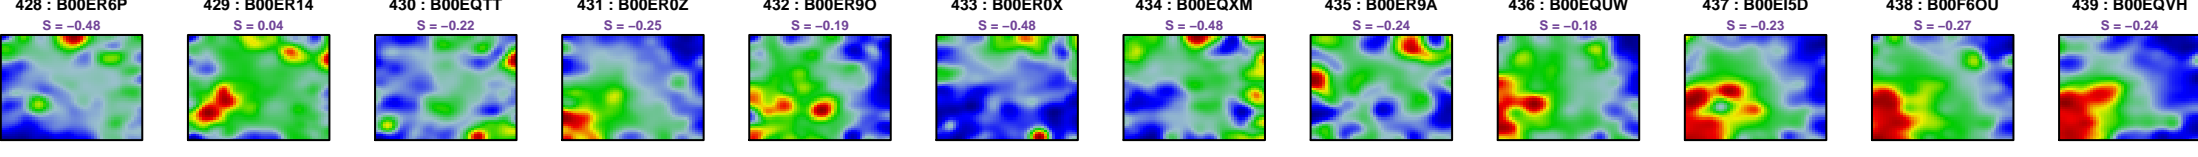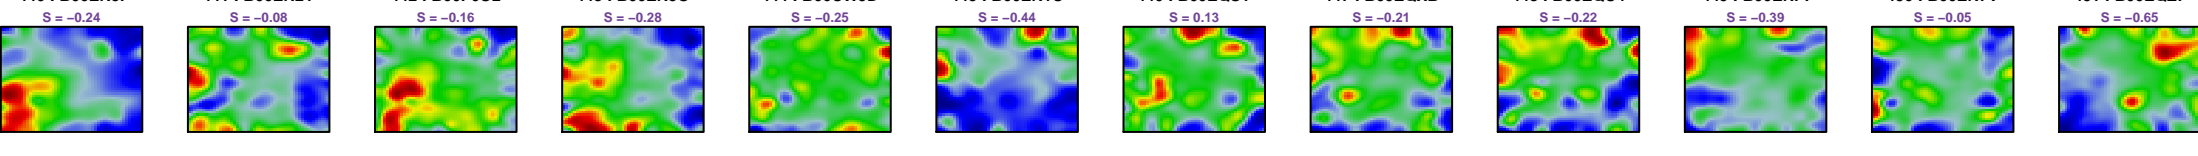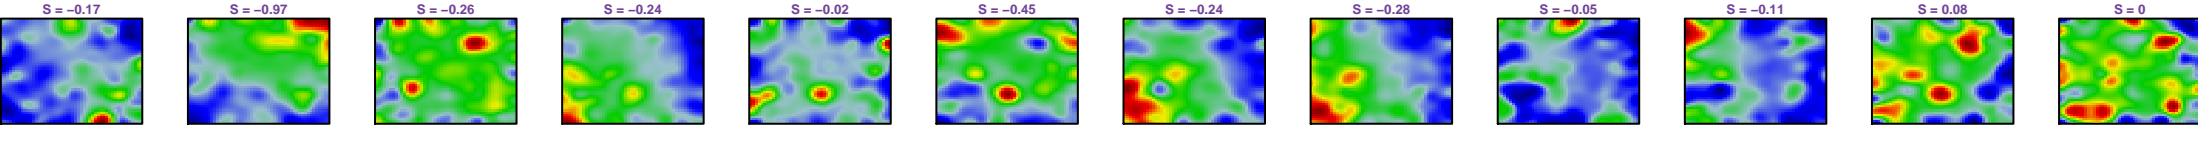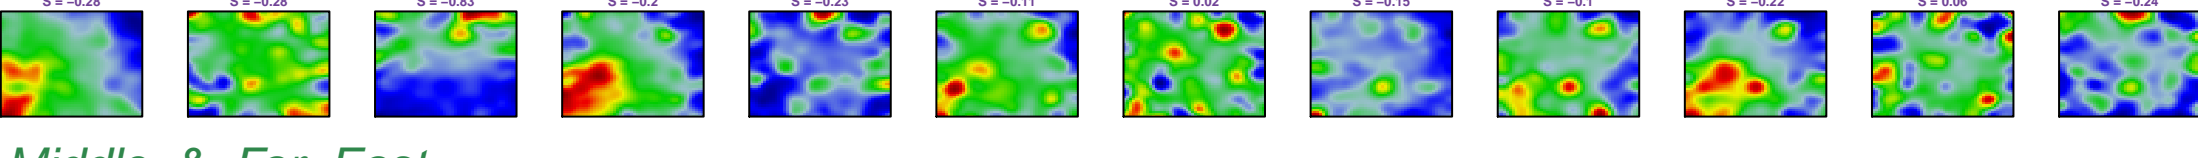

*Middle\_&Far\_East*

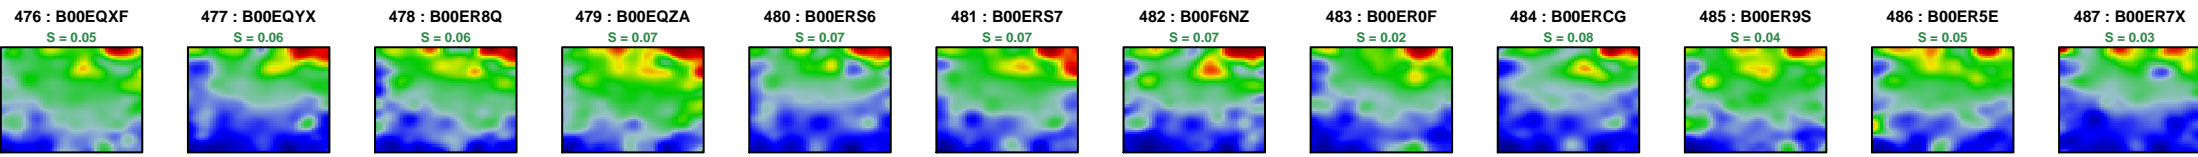

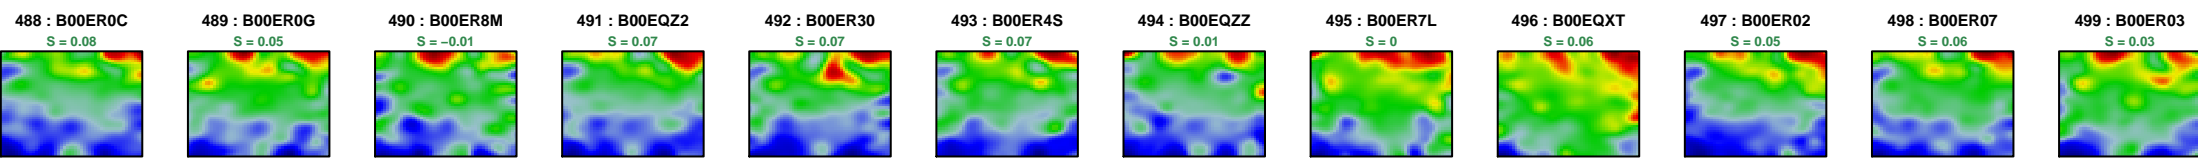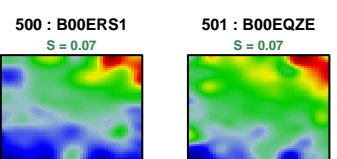

*nd*

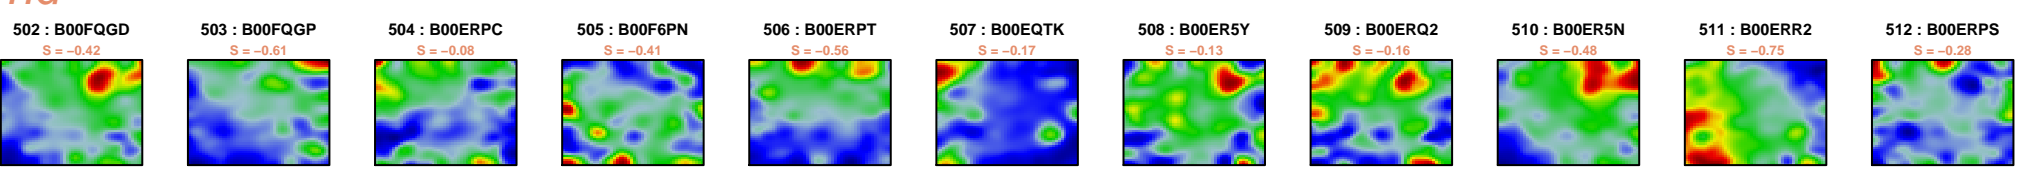

*New\_World*

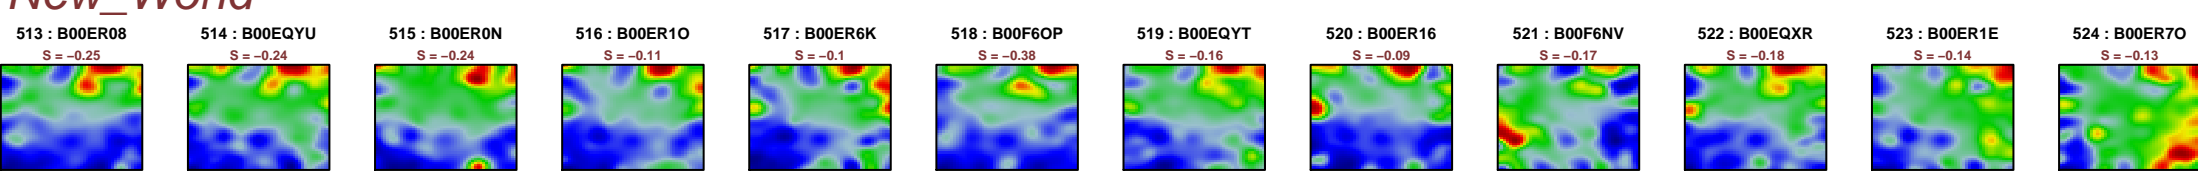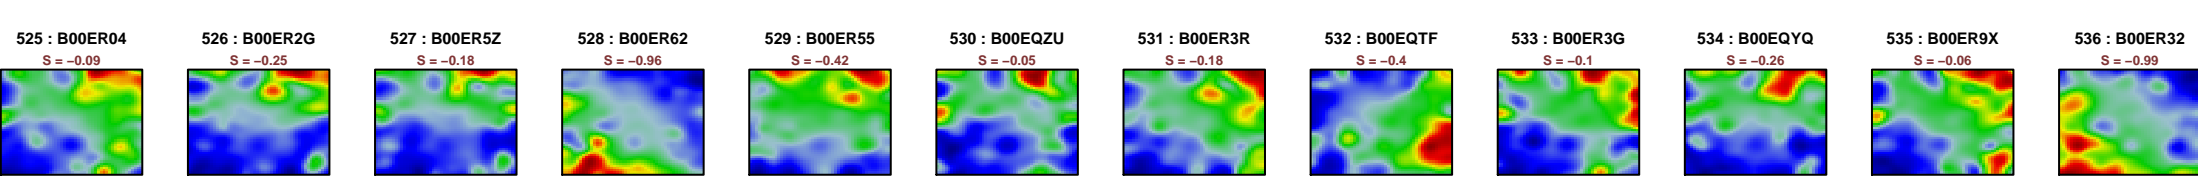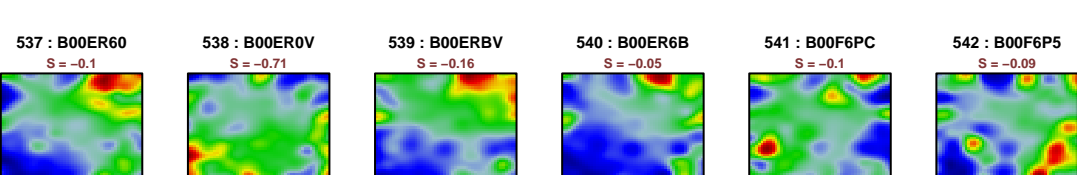

*Northwest\_Africa*

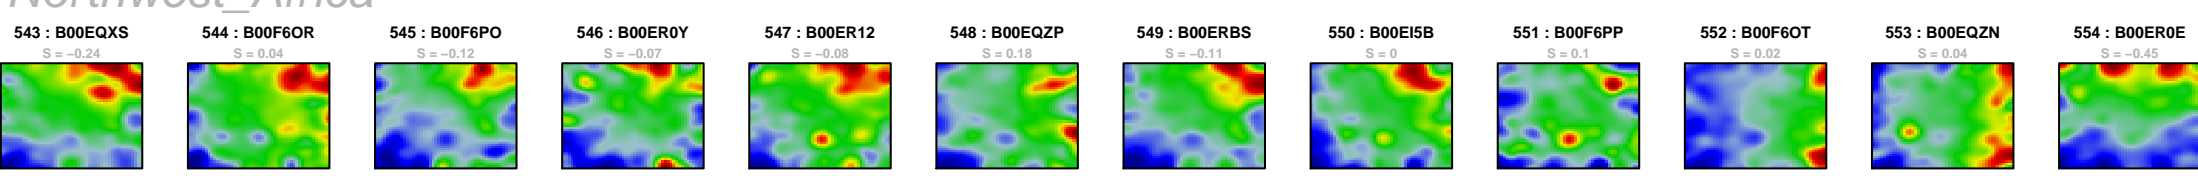

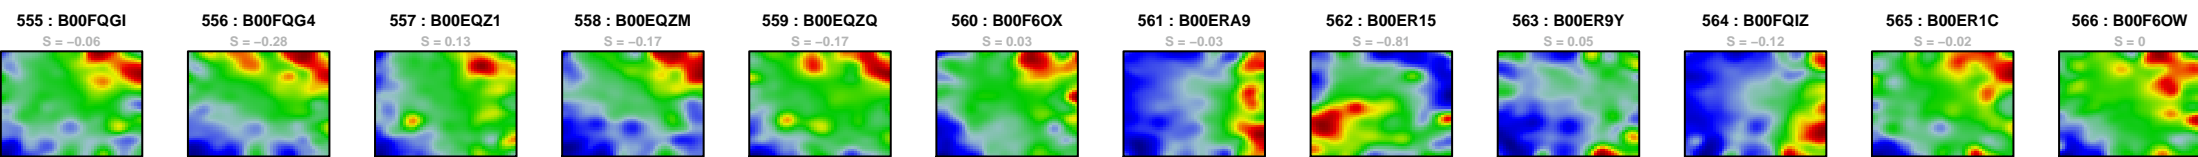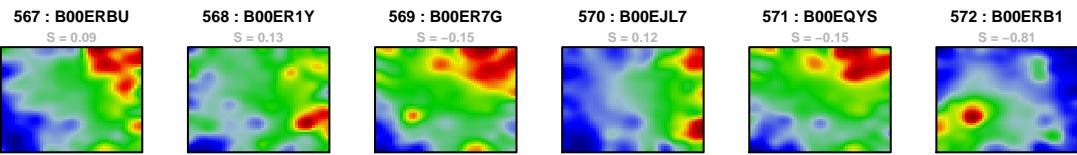

## Russia\_&\_Ukraine

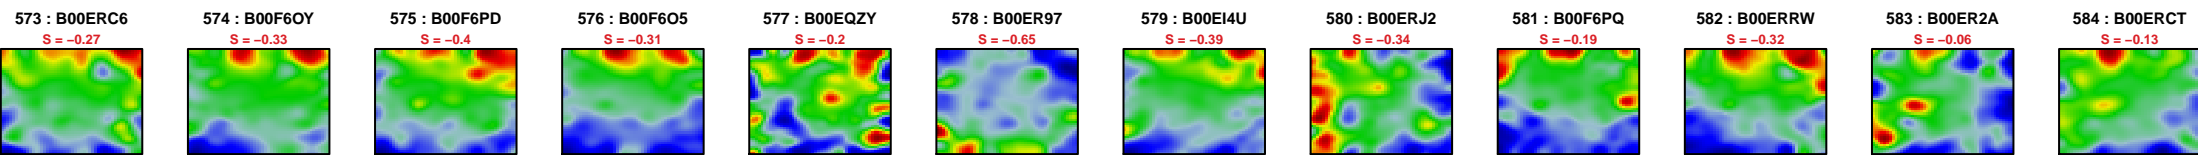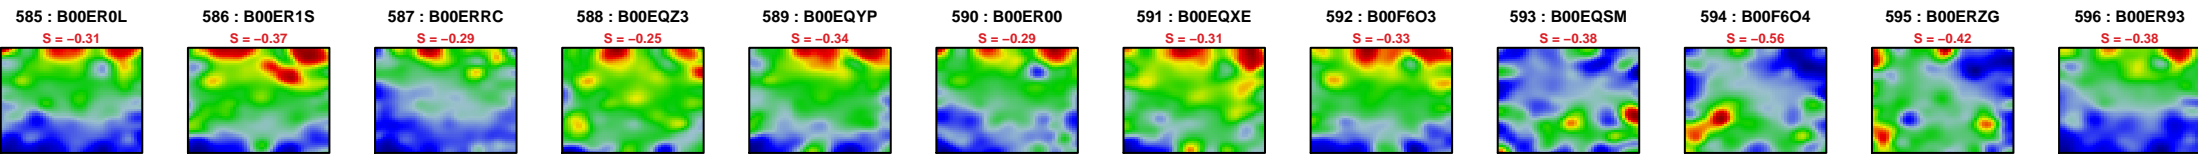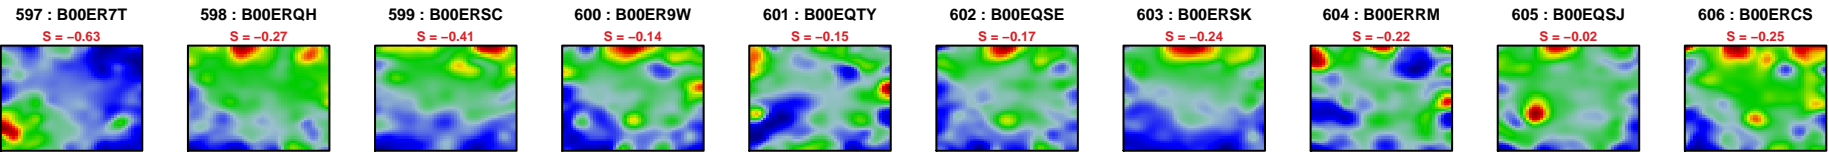

## Western\_&\_Central\_Europe

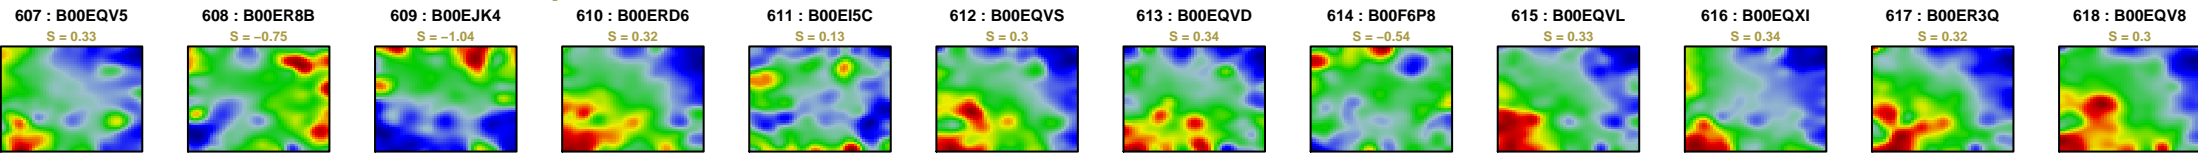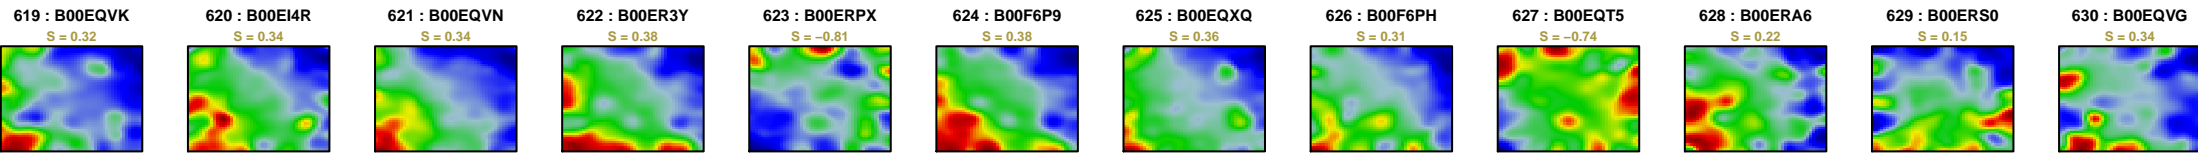

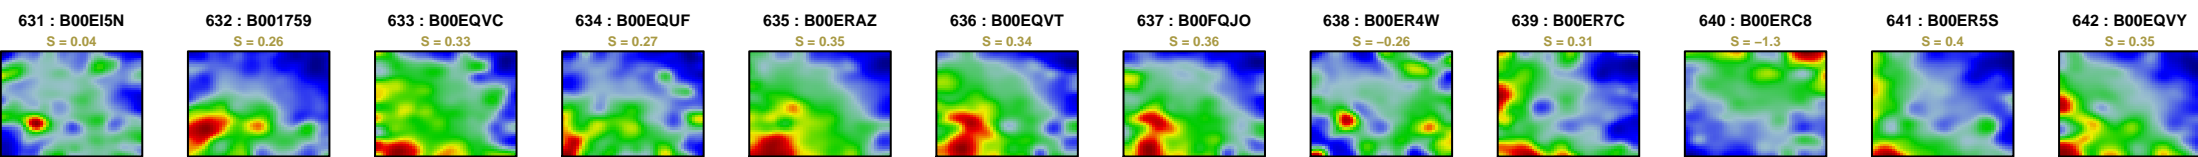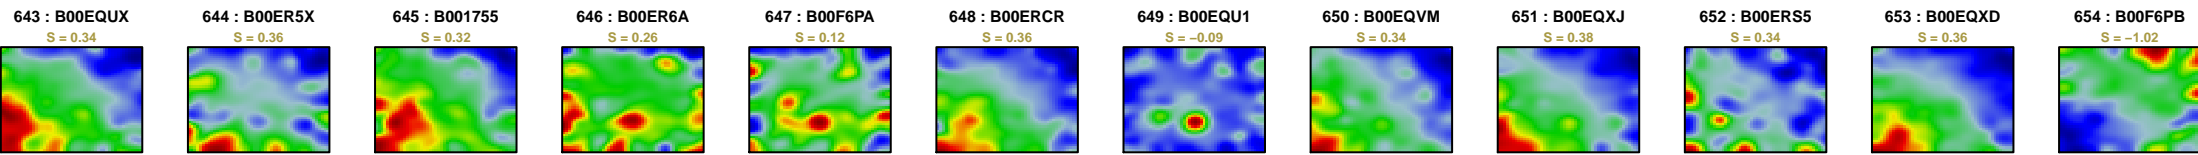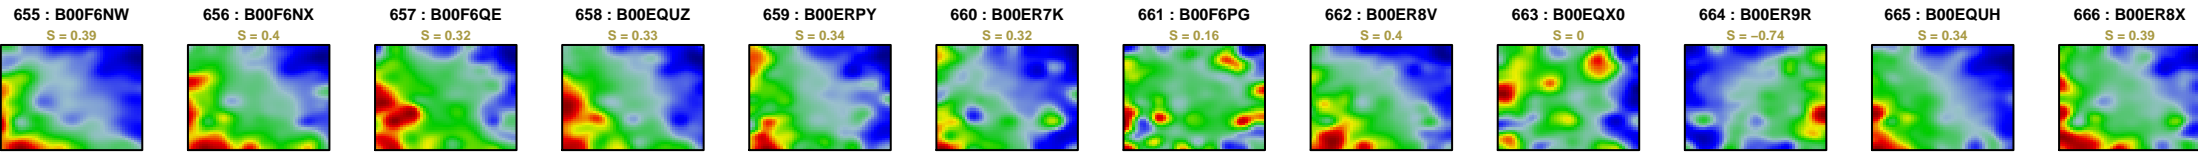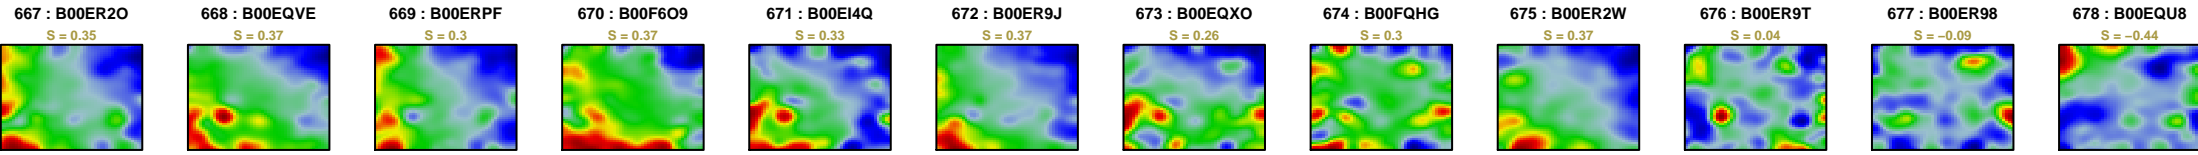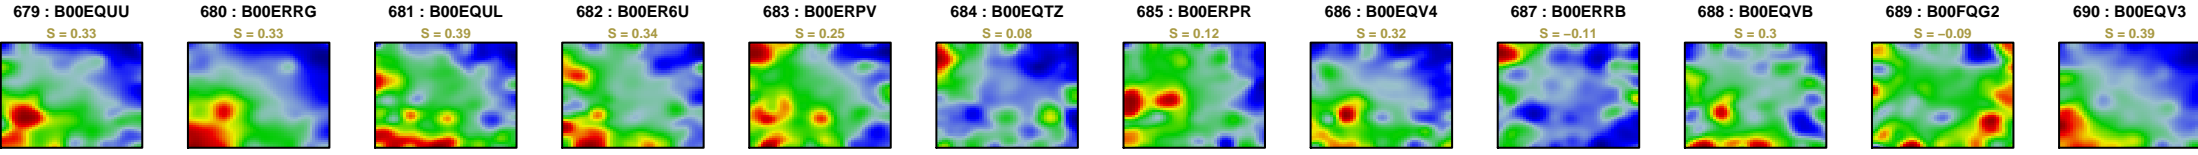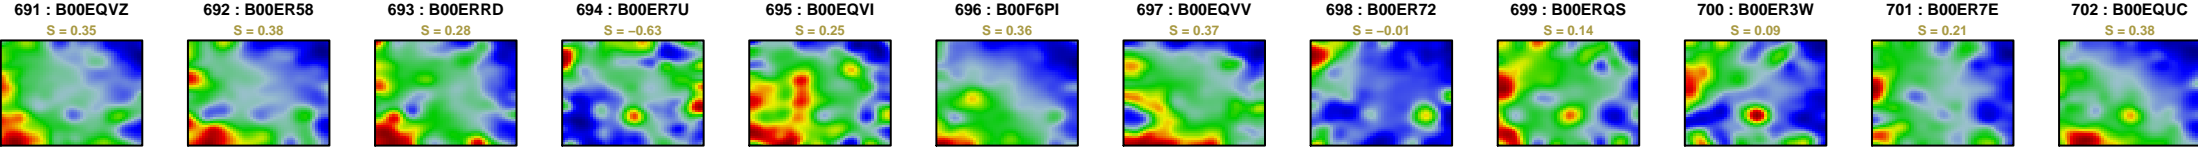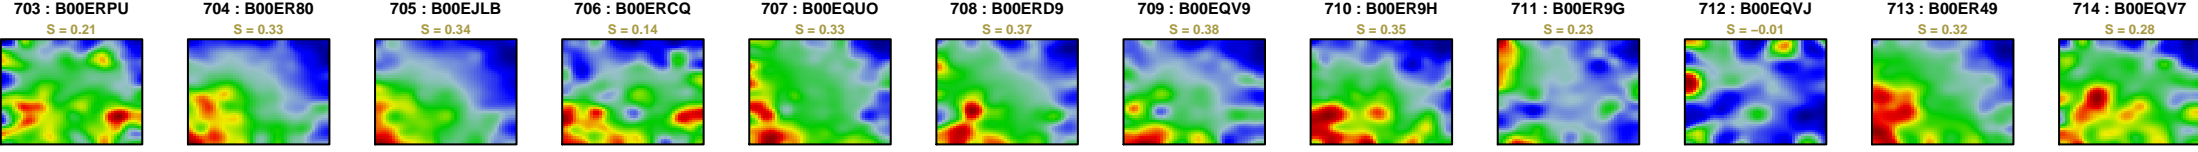



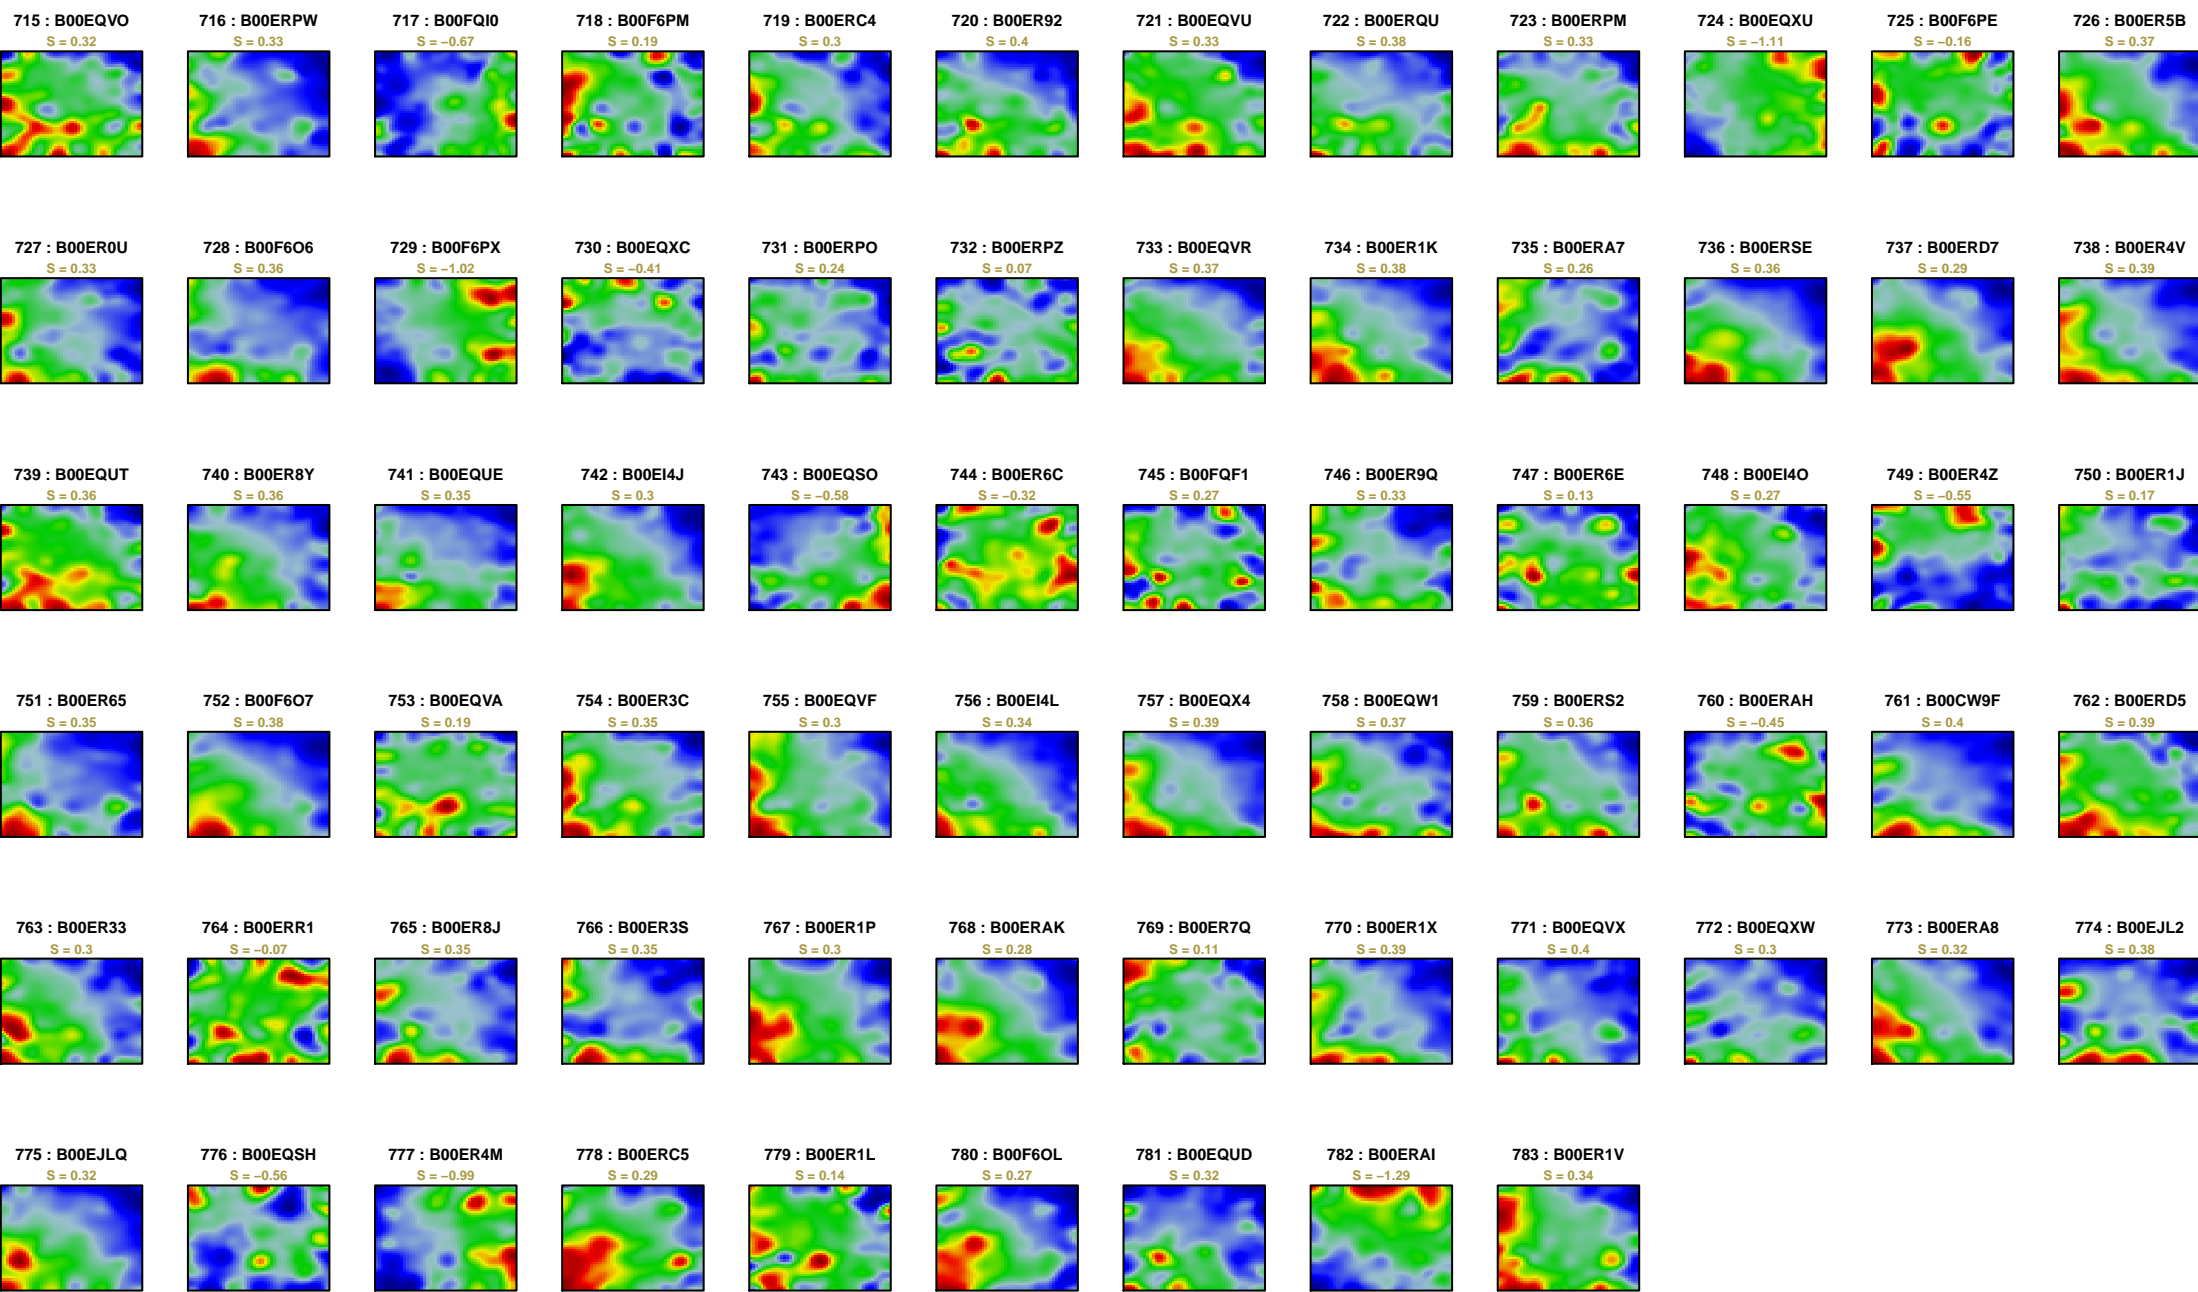

Supplement: s1 [file s1]
